# Supplementary material for: DNA-binding property and antitumor activity of bismuth(iii) complex with 1,4,7,10-tetrakis(2-pyridylmethyl)-1,4,7,10-tetraazacyclododecaneElectronic supplementary information (ESI) available: 1H-NMR, ES-MS and CD spectra. See http://www.rsc.org/suppdata/dt/b3/b305290g/
Source: Royal Society of Chemistry journal article supplement (doi:10.1039/b305290g), 2003-01-01
Supplement: esi.doc [file esi.doc]

**Electronic supplementary information (ESI)**

(X.Y. Wang et al.)


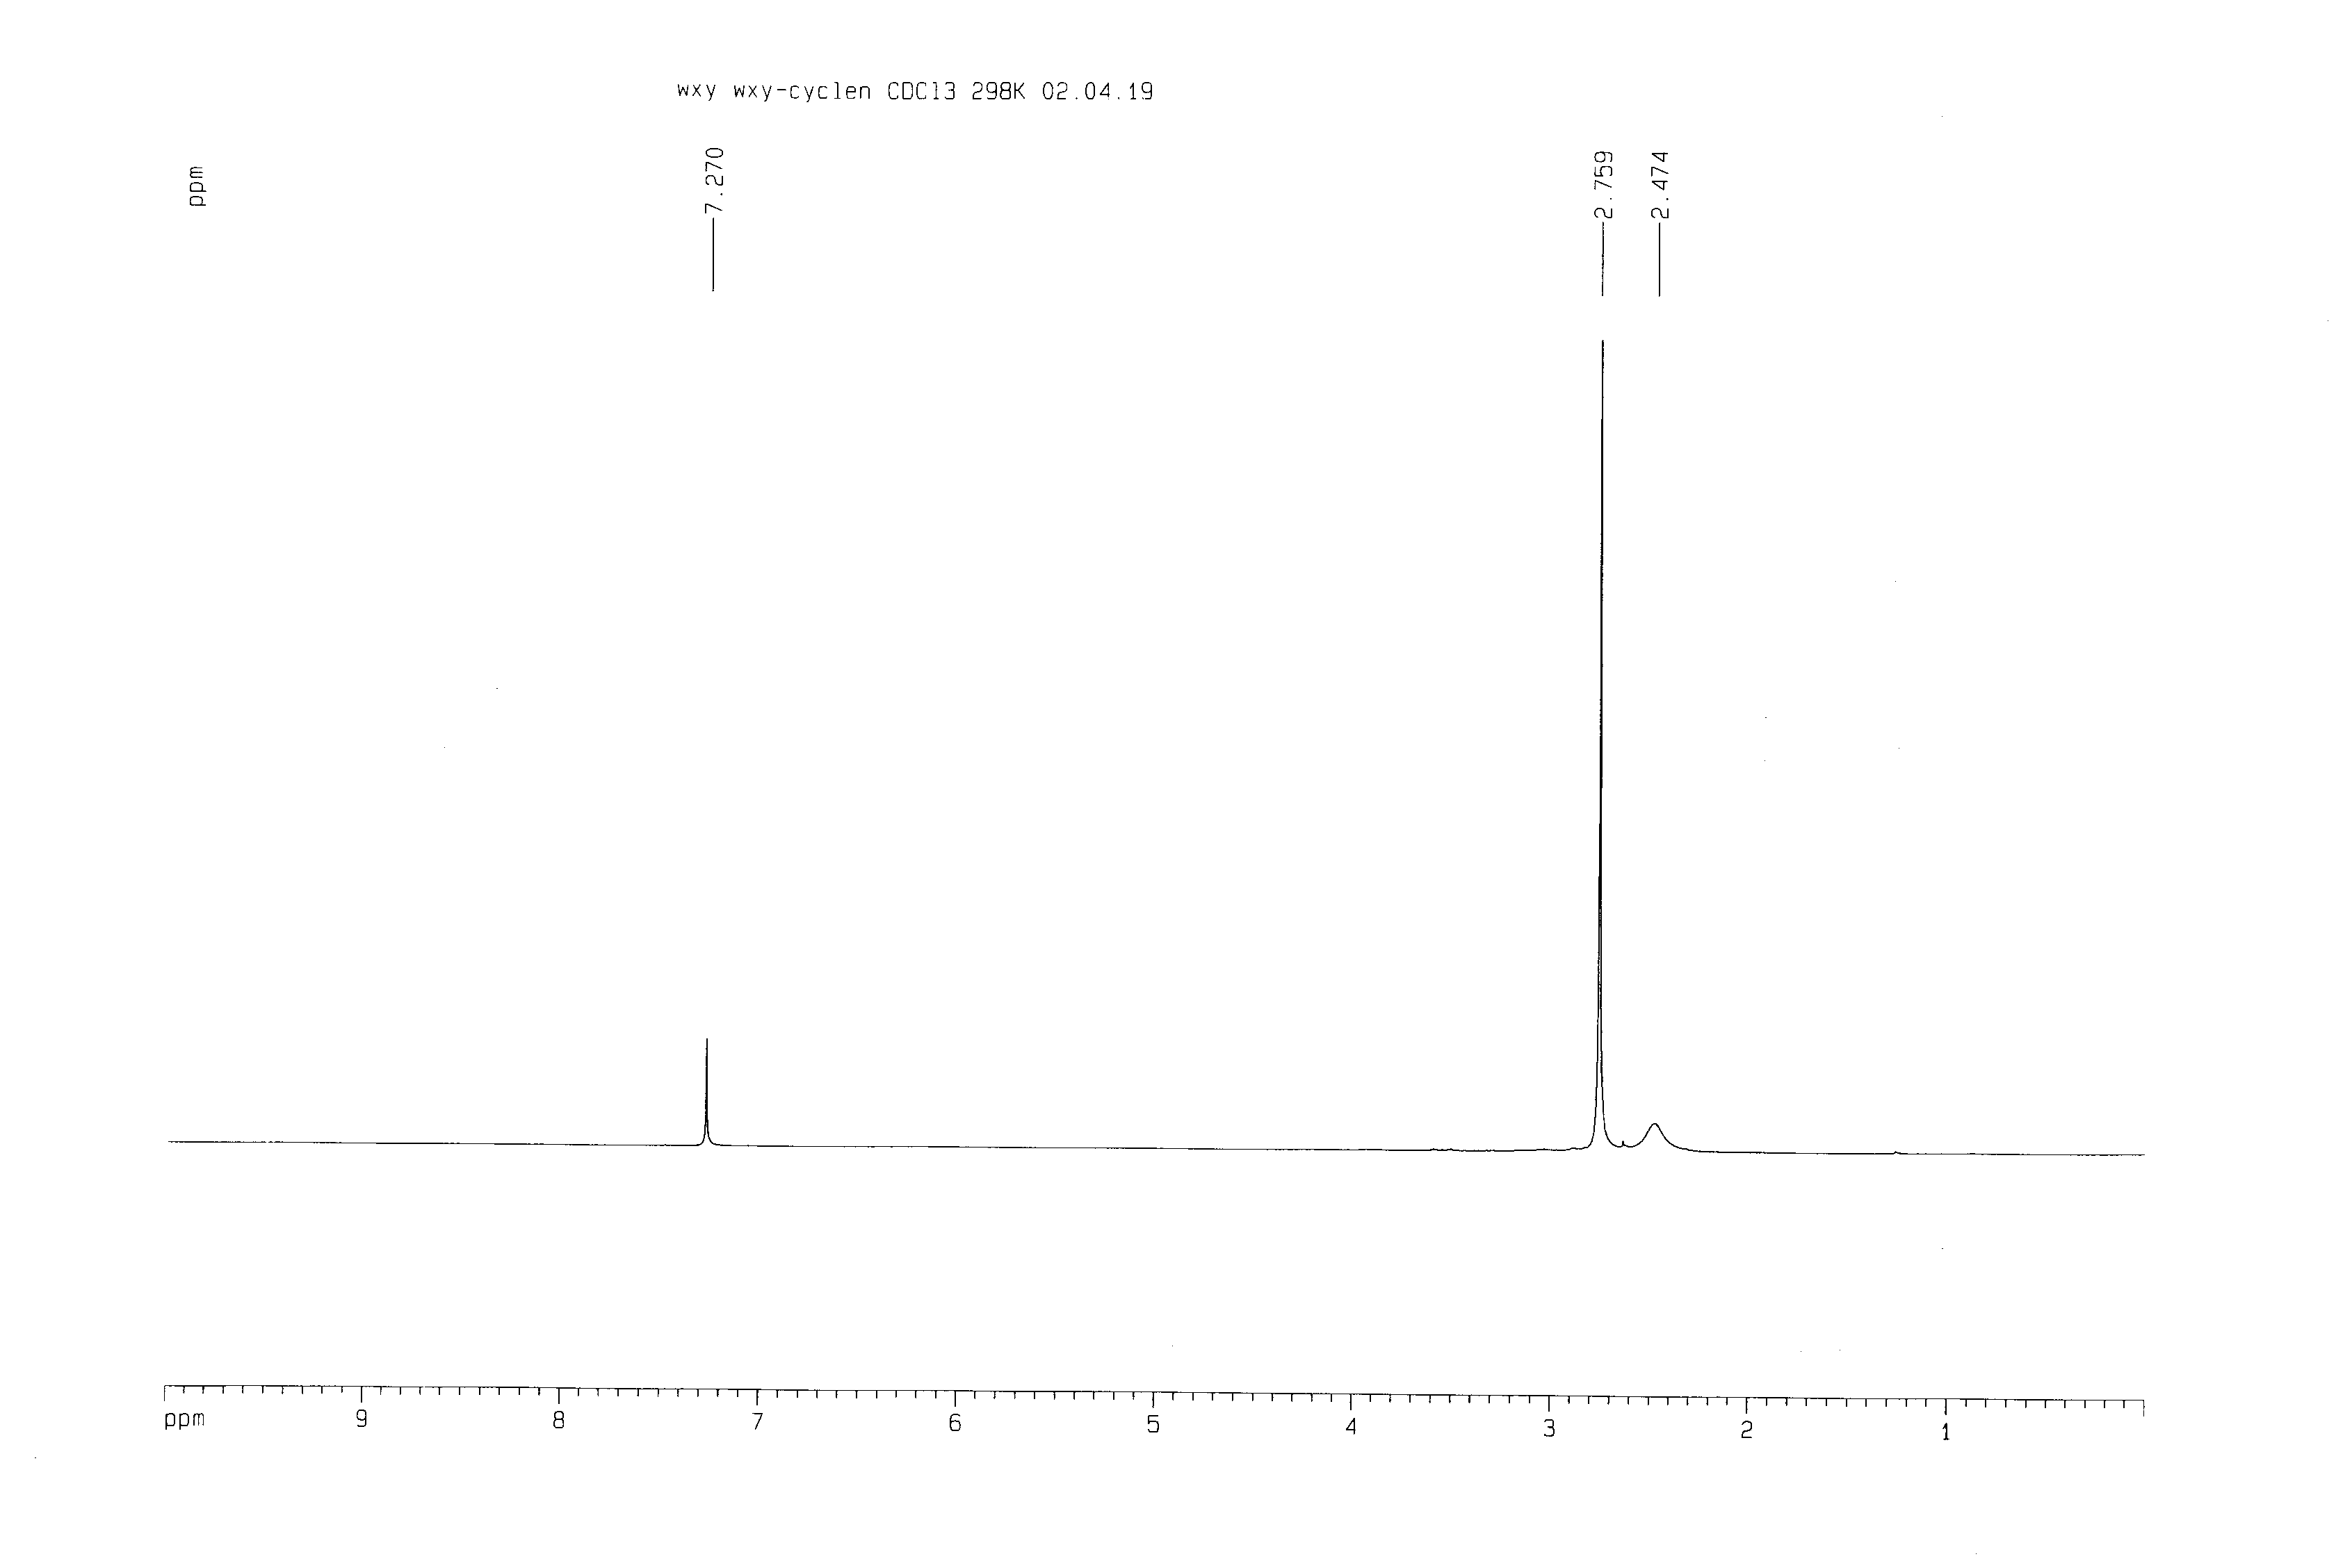


**ESI 1.** The 1H NMR spectrum of cyclen (500 M, CDCl3, 298 K)


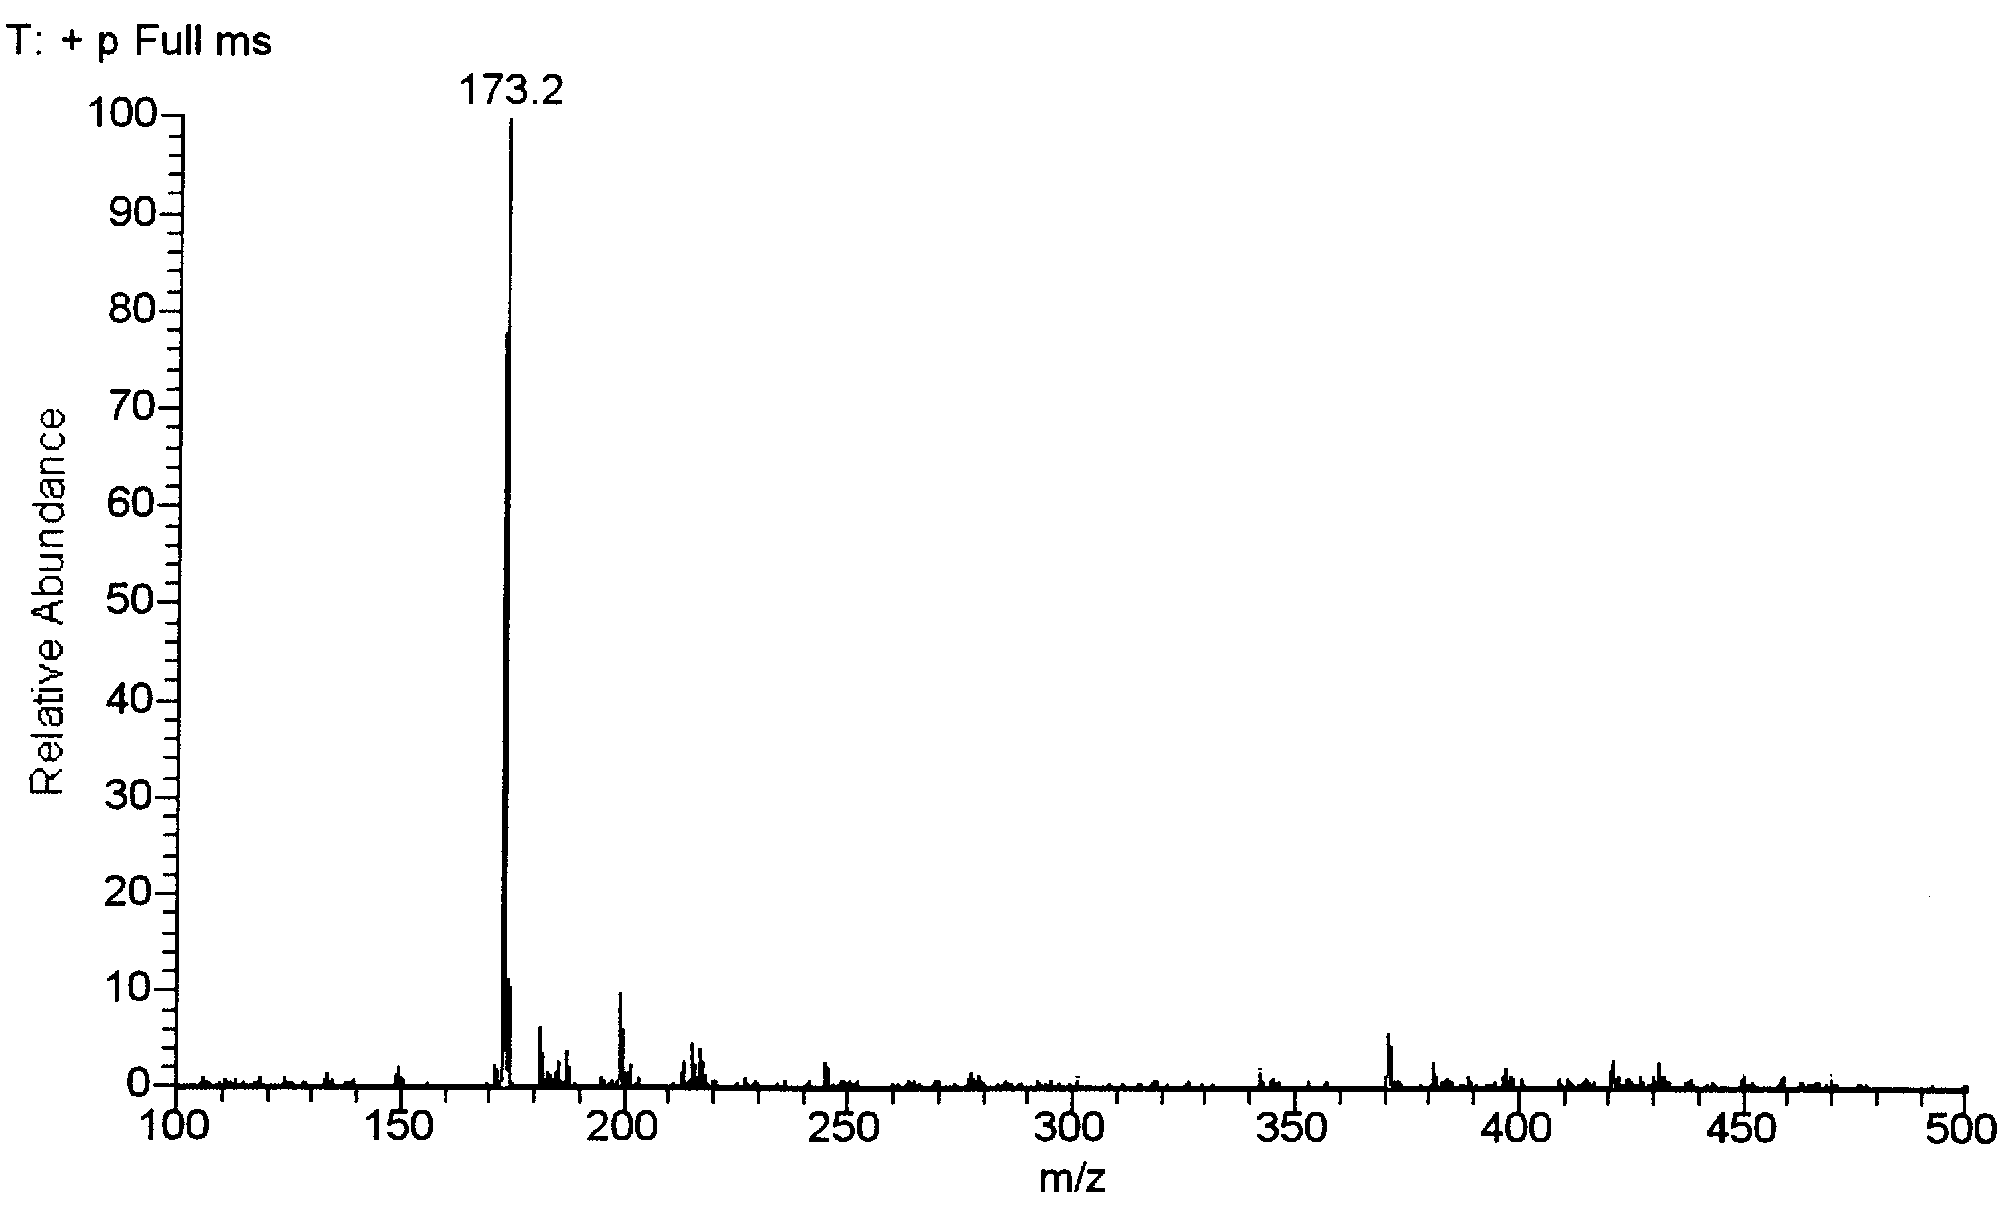


**ESI 2**. The ES-MS spectrum of cyclen in aqueous solution


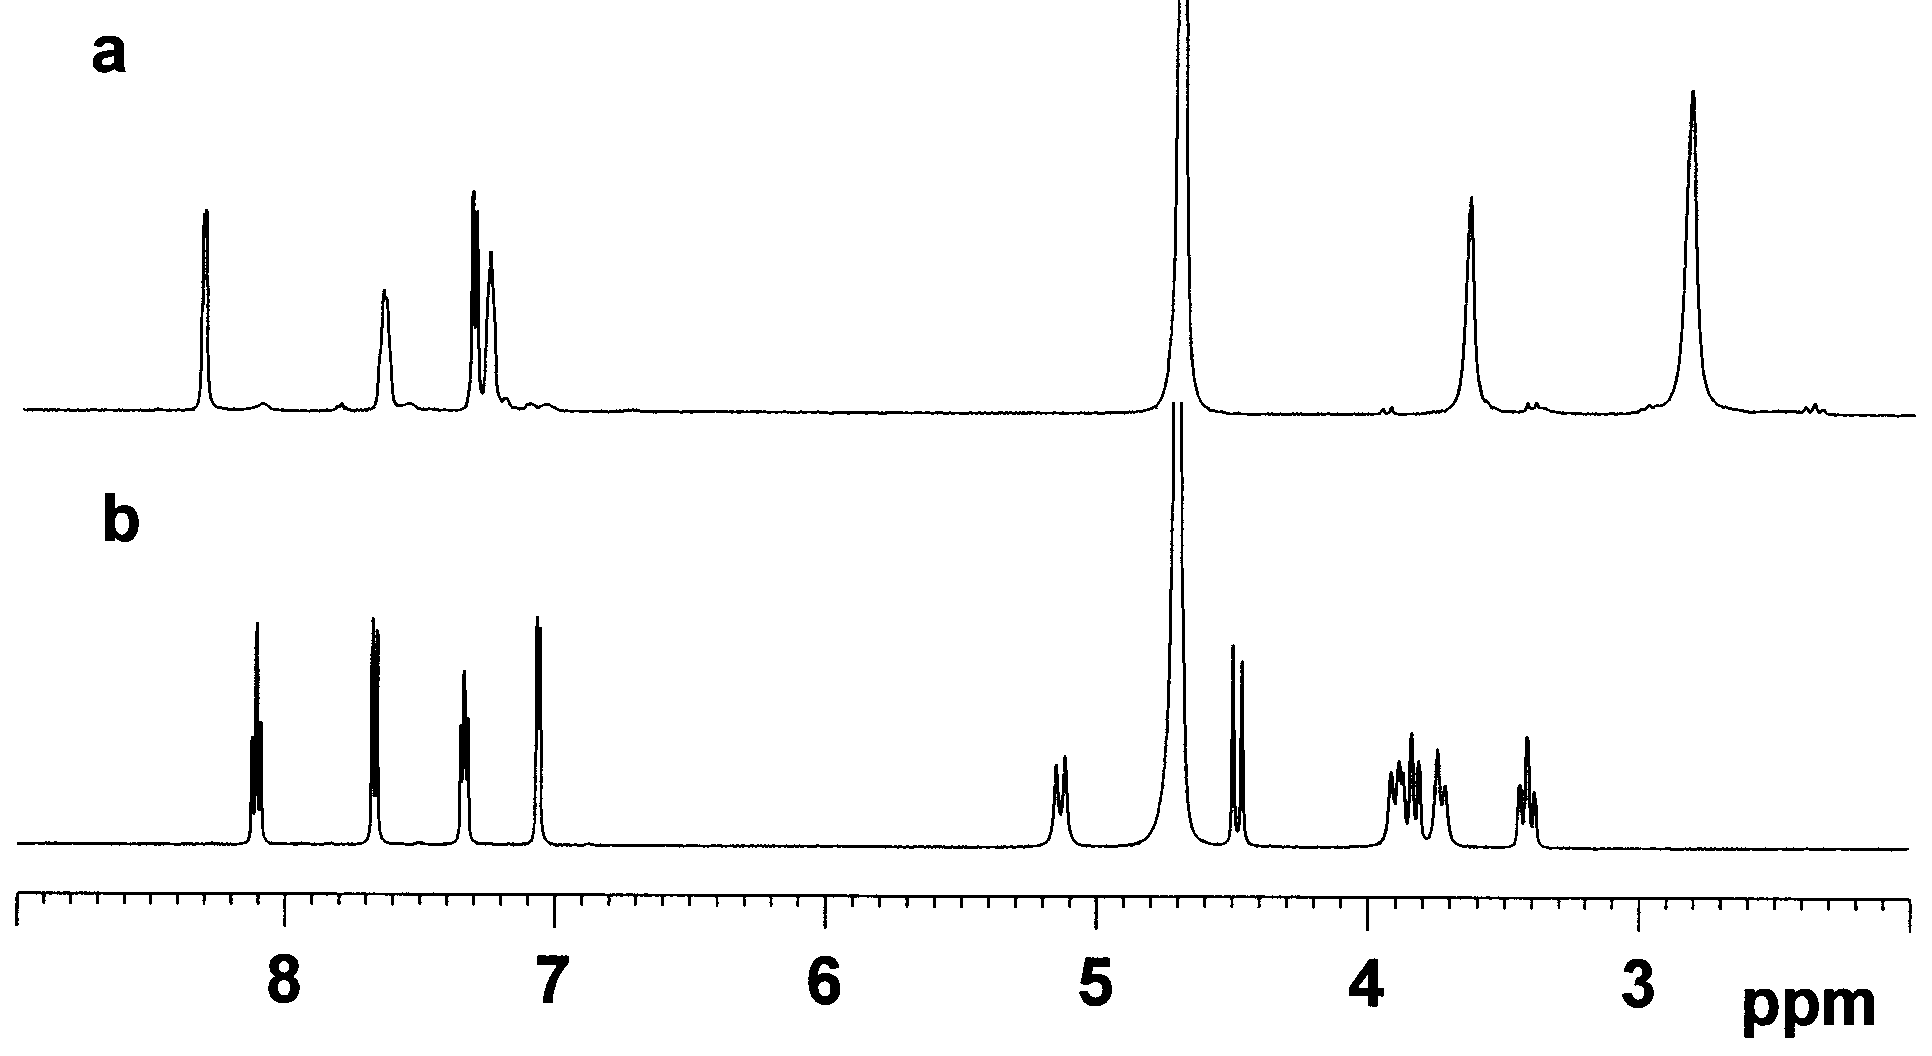
 **ESI 3**. The 1H NMR spectra of TPC (**a**) and BiTPC (**b**) (500 M, D2O, 298 K)


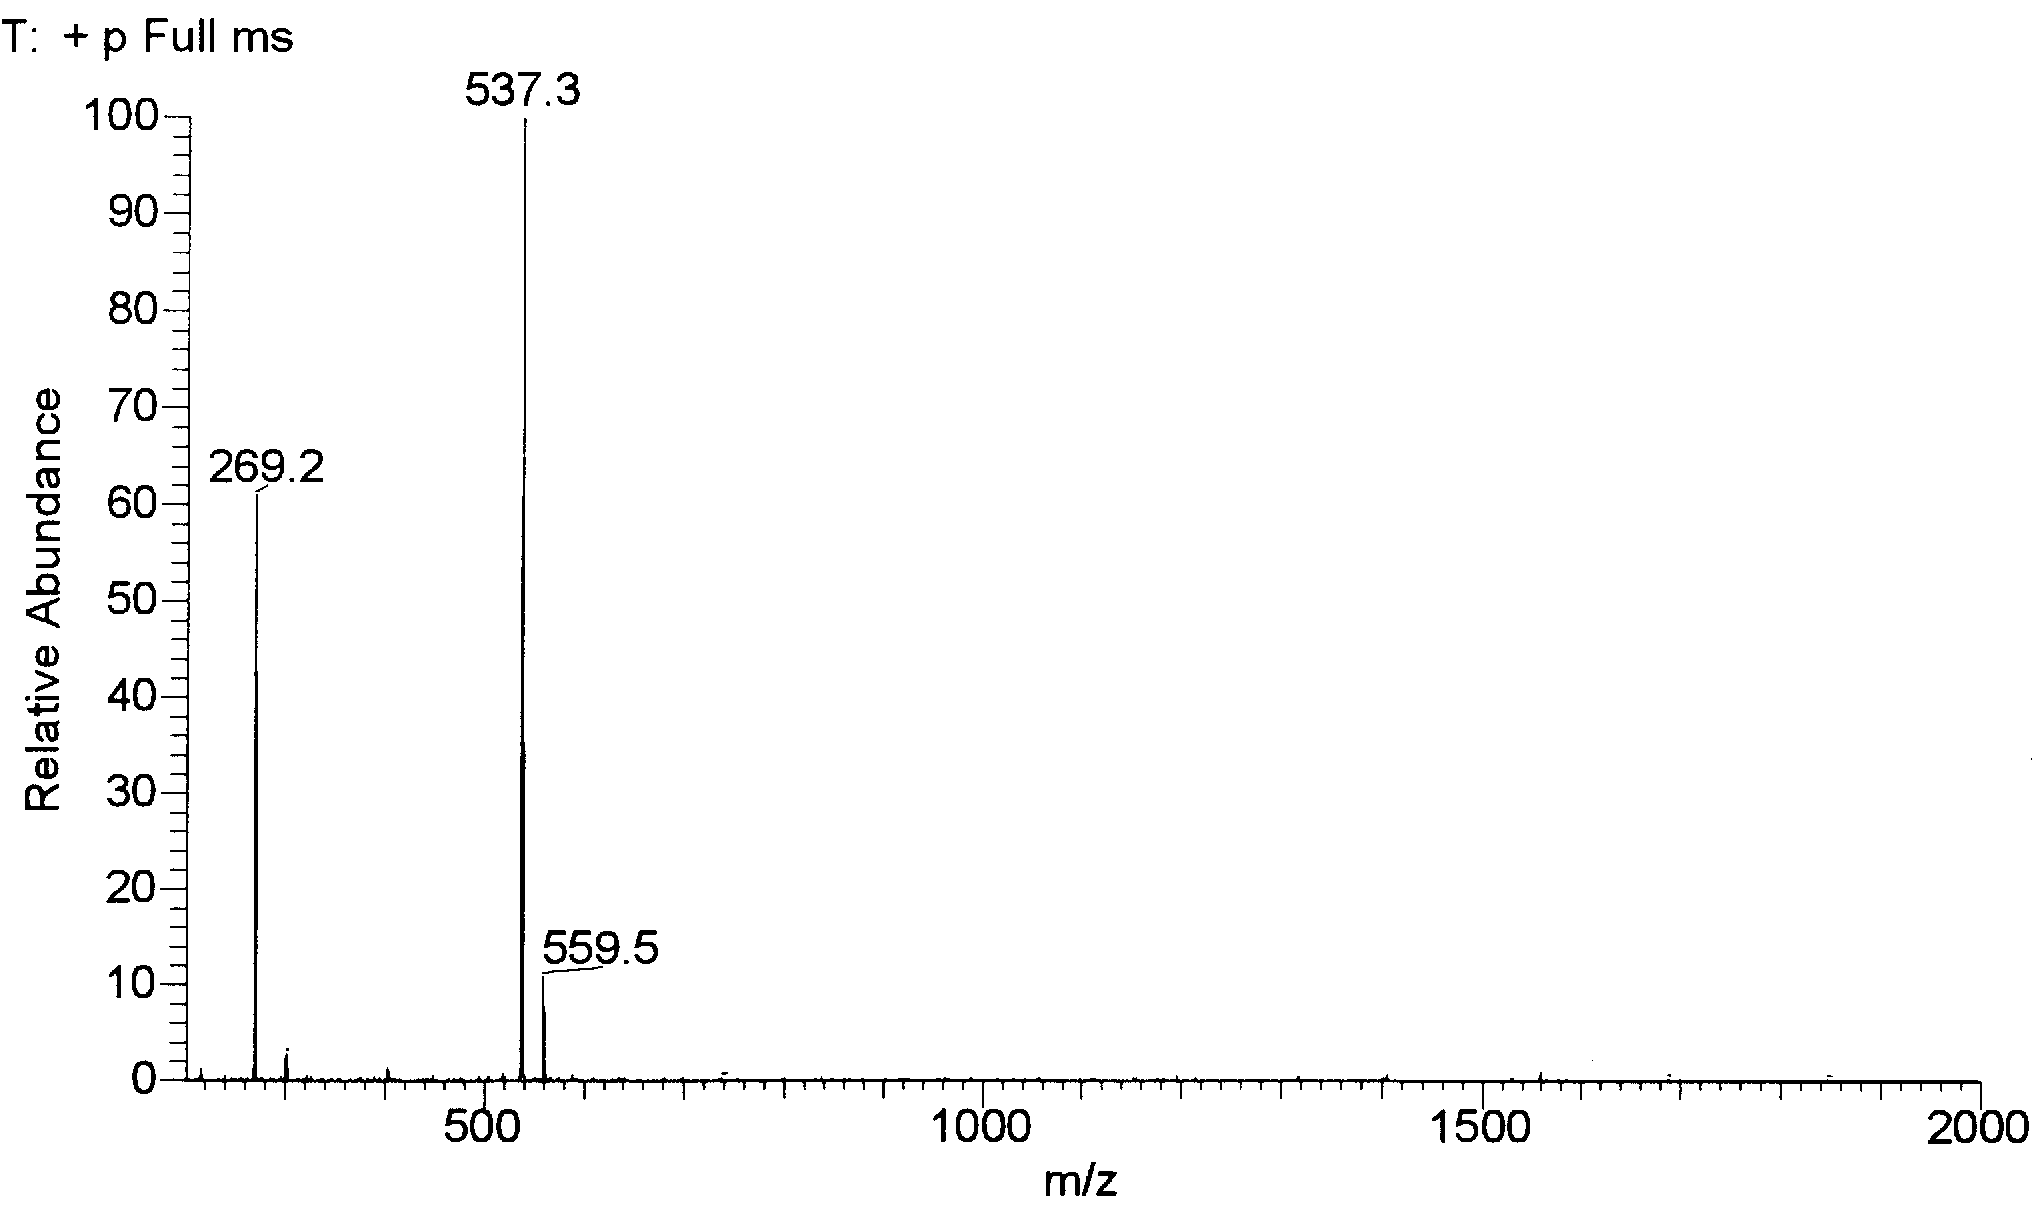


**ESI 4**. The ES-MS spectrum of TPC in aqueous solution


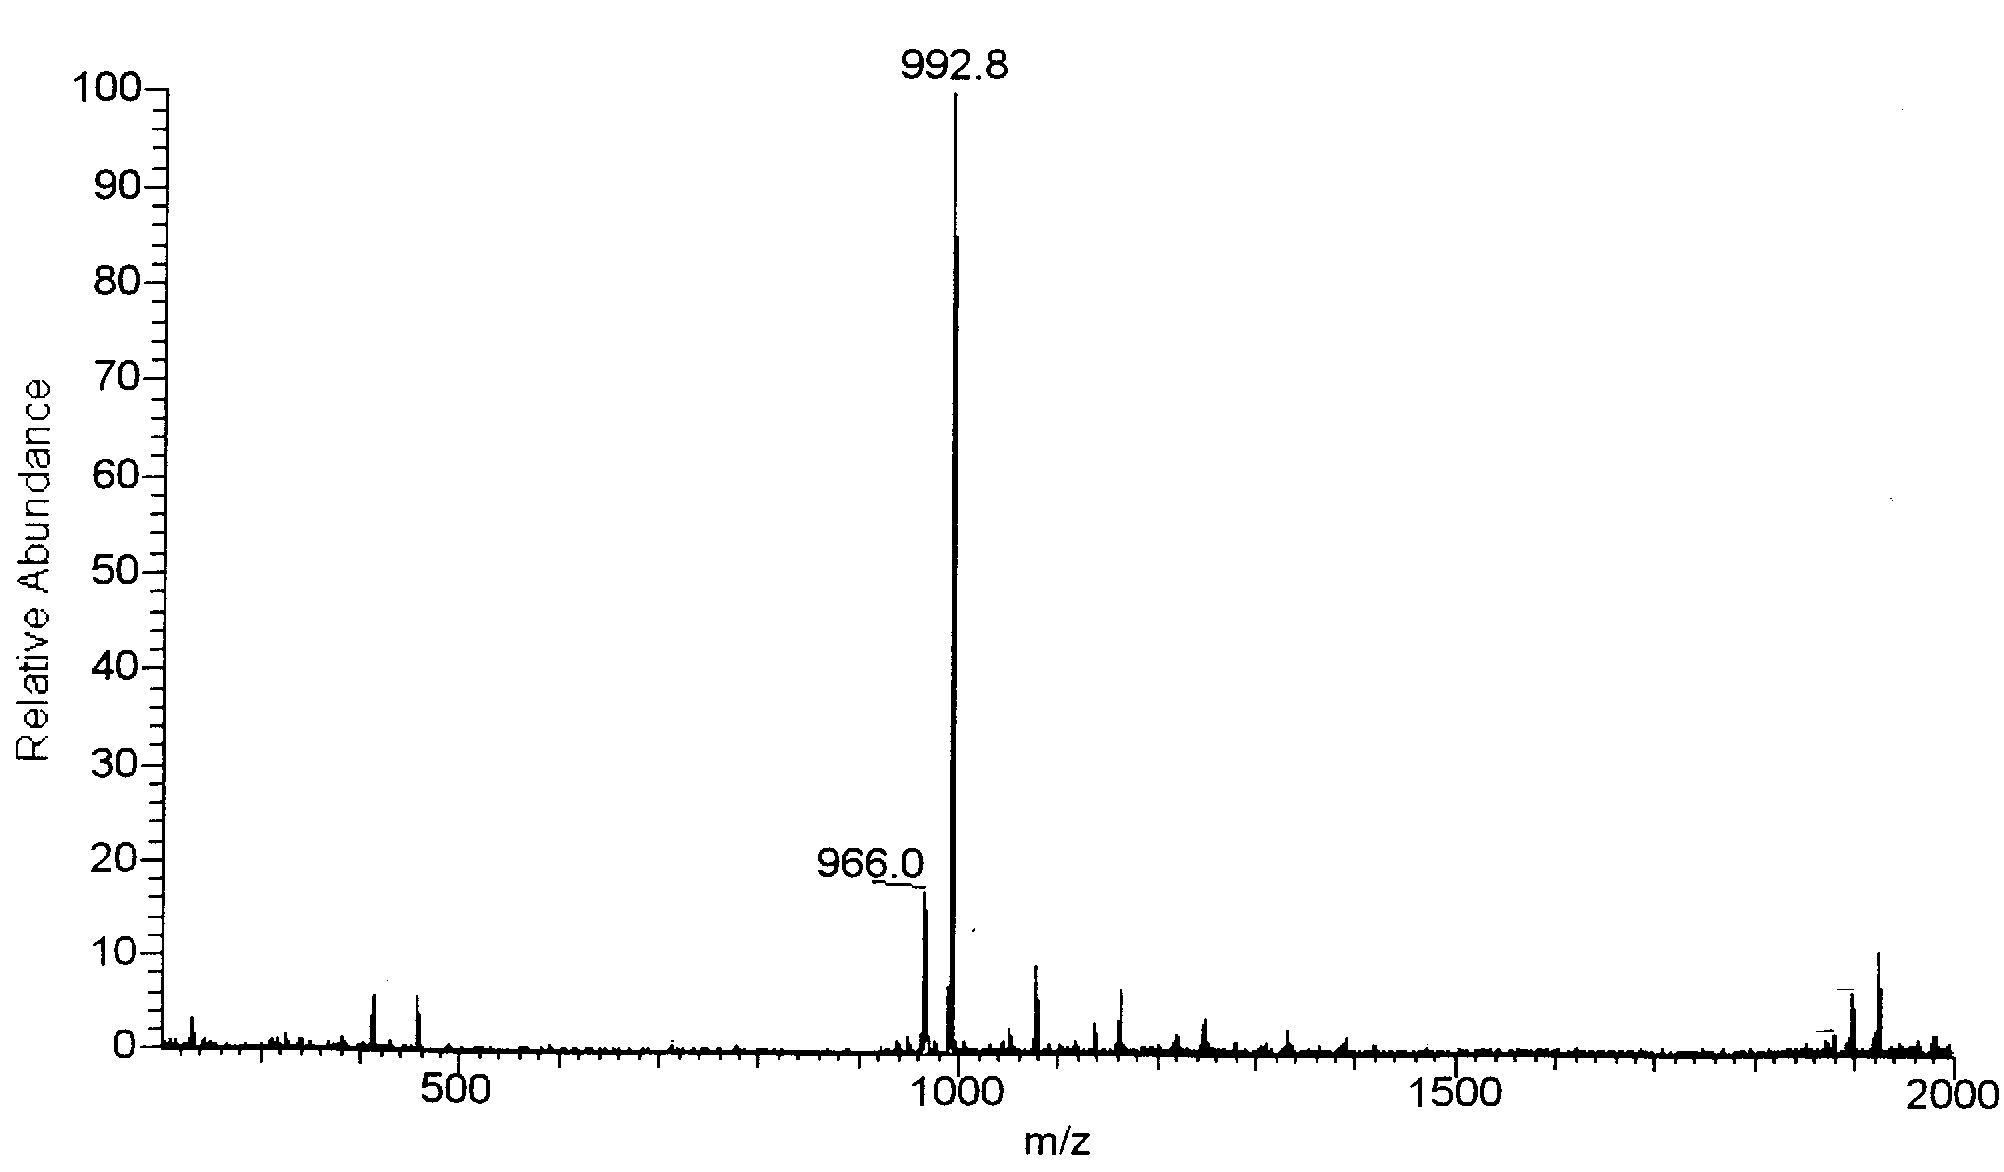


**ESI 5**. The ES-MS spectrum of BiTPC in aqueous solution

**
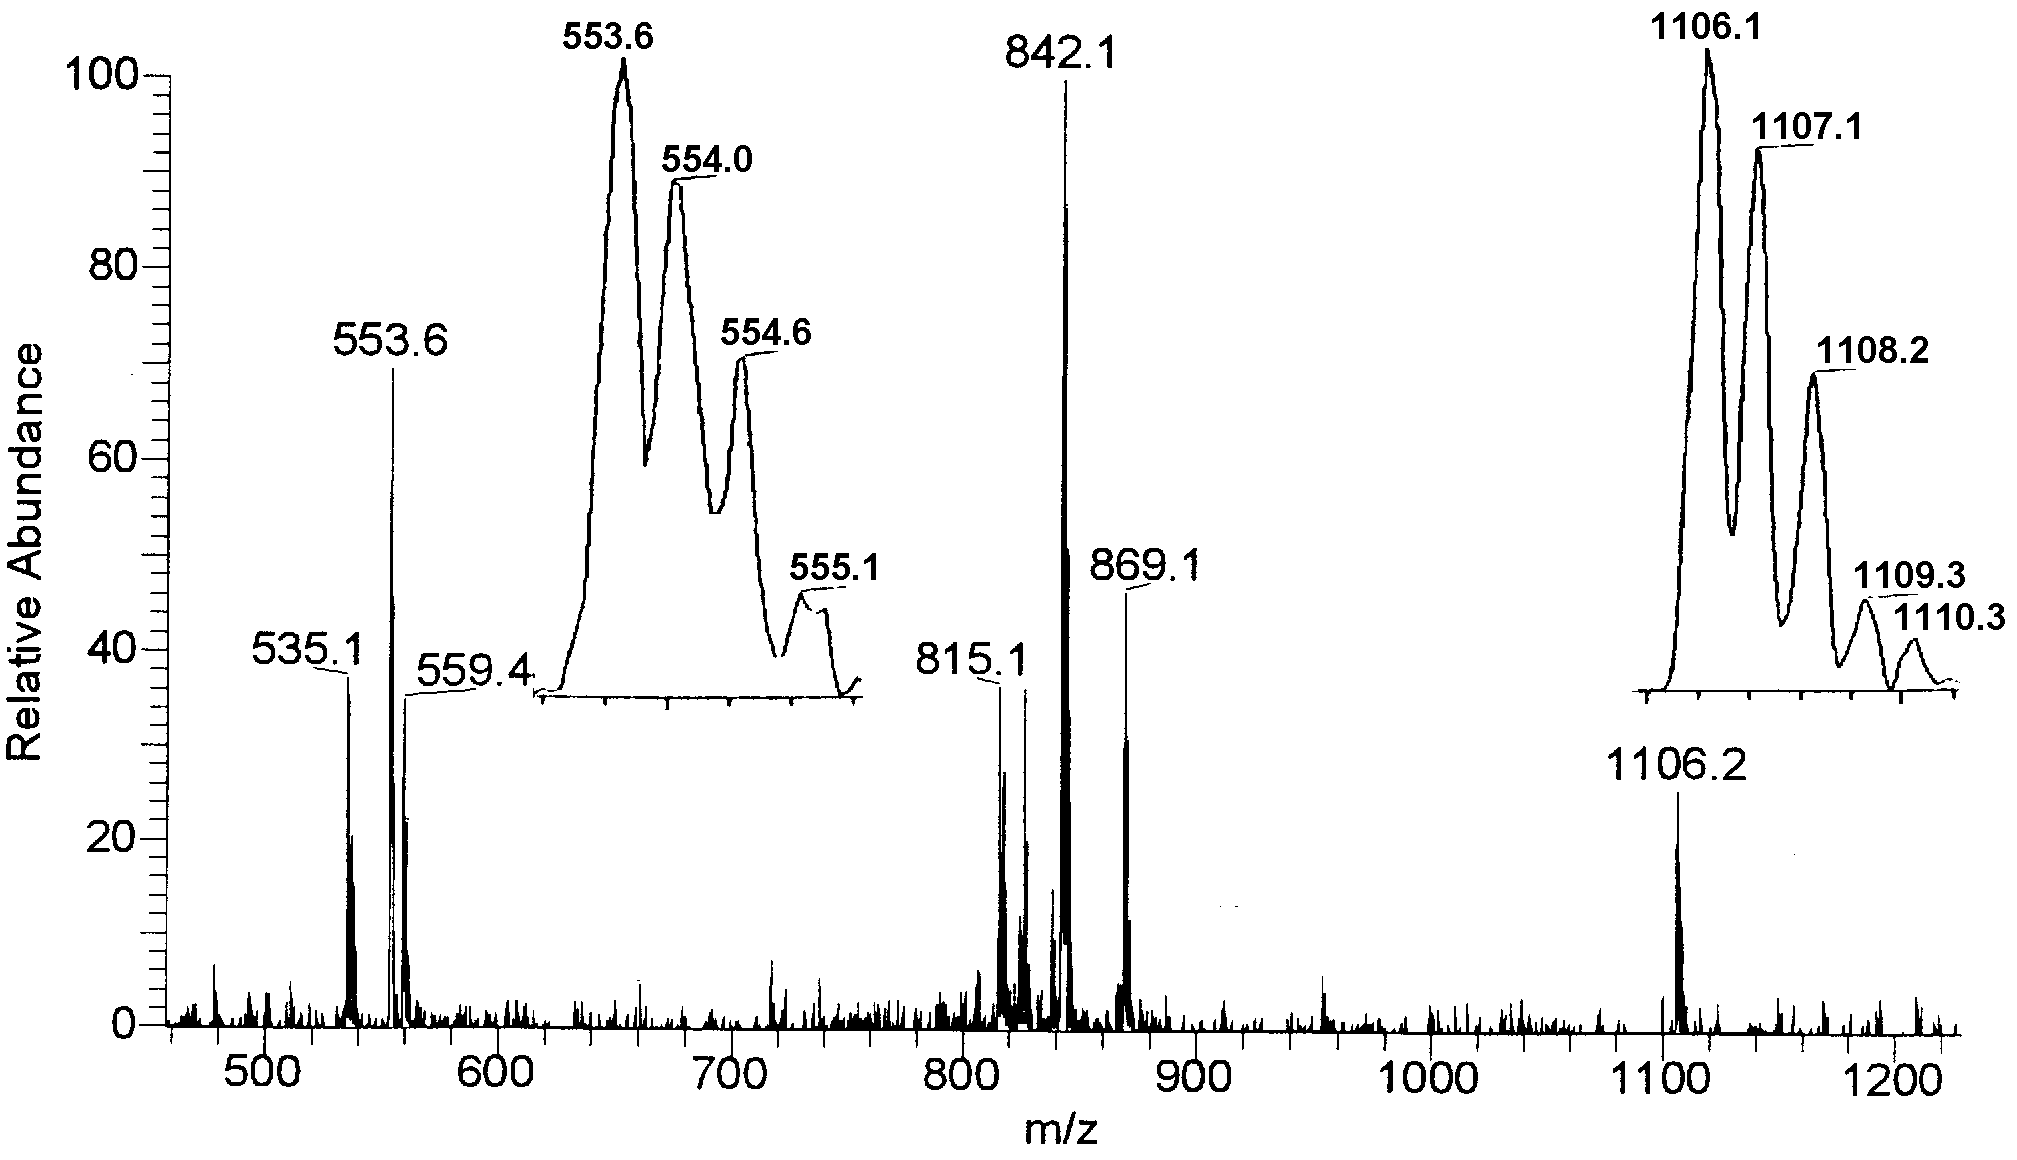
**

**ESI 6**. ES-MS spectrum of the BiTPC + 5'-GMP aqueous solution after 48 h incubation (310 K). The peaks at 1106.2 and 553.6 can be assigned to [BiTPC(5'-GMP)]+ and [BiTPC(5'-GMP)]2+, respectively.


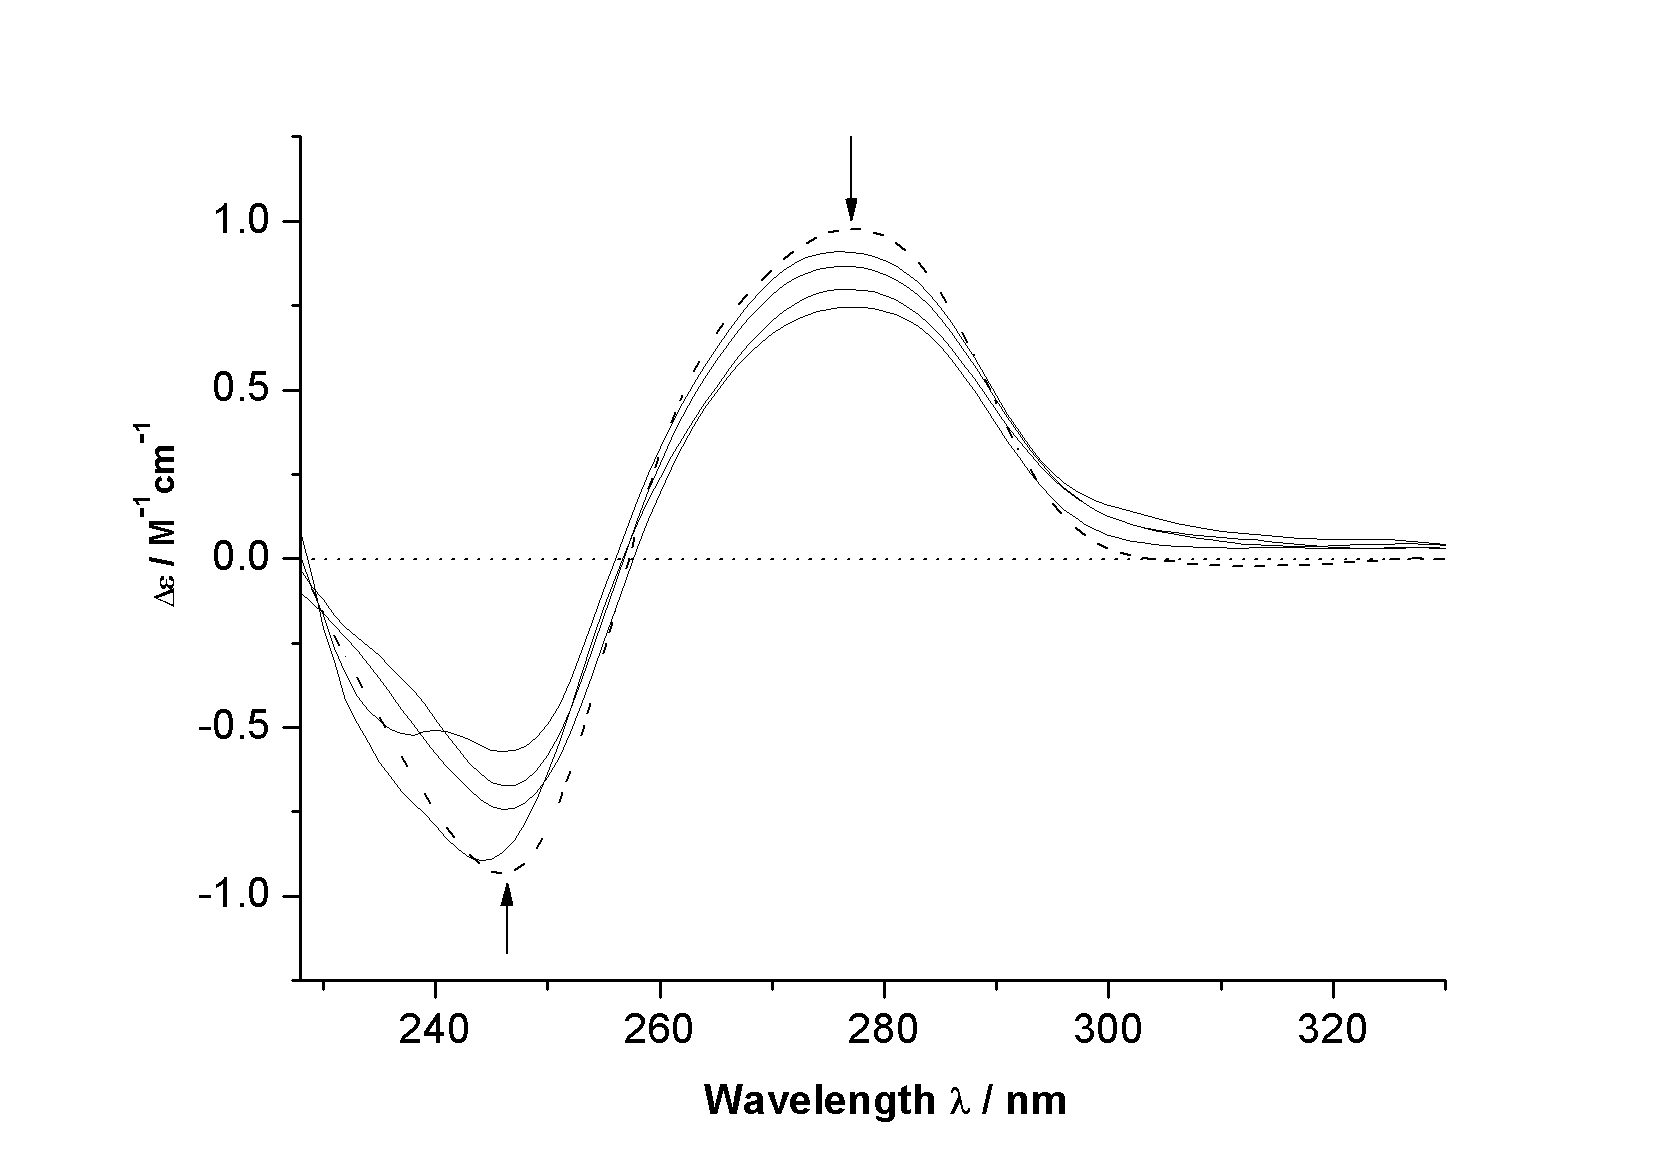


**ESI 7**. CD spectra of CT-DNA in the buffer solution (Tris-HCl) with the increasing concentration of BiTPC.
